# Supplementary material for: Tribocharged granular assembly of polystyrene beads confined between plates using acoustic vibrations
Source: Royal Society of Chemistry journal article supplement (doi:10.1039/d4sm01017e), 2024-01-01
Supplement: d4sm01017e1.pdf [file d4sm01017e1.pdf]

Access Supporting Information material: [ARTICLE VIDEOS - Google Drive](#)
